# Supplementary material for: A colorimetric chemosensor for sulfide in a near-perfect aqueous solution: practical application using a test kit
Source: Royal Society of Chemistry journal article supplement (doi:10.1039/c6ra19599g), 2016-01-01
Supplement: c6ra19599g1.pdf [file c6ra19599g1.pdf]

## Supporting Information

### **A colorimetric chemosensor for sulfide in a near-perfect aqueous solution: Practical application using test kit**

Seong Youl Lee, Cheal Kim\*

*Department of Fine Chemistry and Department of Interdisciplinary Bio IT Materials, Seoul National University of Science and Technology, Seoul 139-743, Korea. Fax: +82-2-973-9149; Tel: +82-2-970-6693; E-mail: [chealkim@seoultech.ac.kr](mailto:chealkim@seoultech.ac.kr)*

**Table S1.** Examples of various S<sup>2-</sup> chemosensors with colorimetric test strip

| Sensor                                                                            | Detection limit ( $\mu\text{M}$ ) | Binding constant  | Interference | Percent of water in solution (%) | Method of detection        | Concentration of sensor/S <sup>2-</sup> in test strip ( $\mu\text{M}$ ) | Reference |
|-----------------------------------------------------------------------------------|-----------------------------------|-------------------|--------------|----------------------------------|----------------------------|-------------------------------------------------------------------------|-----------|
| 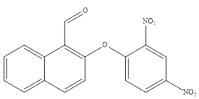 | 1.67                              | No data           | None         | 50                               | Fluorescence, Colorimetric | 20 / 200                                                                | 1         |
|  | 46.97                             | $5.0 \times 10^2$ | None         | 99.9                             | Colorimetric               | 3000 / 50                                                               | 2         |
|  | 0.77                              | No data           | No data      | 50                               | Fluorescence, Colorimetric | 20 / 100                                                                | 3         |
|  | 28.4                              | No data           | No data      | 99.9                             | Colorimetric               | 100 / 2000                                                              | 4         |
|  | 28.7                              | $1.0 \times 10^2$ | None         | 99.9                             | Colorimetric               | 100 / 30                                                                | This work |

## References

- 1 A. K. Das, S. Goswami, C. K. Quah and H. Fun, *New J. Chem.*, 2015, **39**, 5669-5675.
- 2 J. J. Lee, Y. S. Kim, E. Nam, S. Y. Lee, M. H. Lim and C. Kim, *Dalton Trans.*, 2016, **45**, 5700-5712.
- 3 A. K. Das, S. Goswami, G. Dutta, S. Maity, T. kanti Mandal, K. Khanra and N. Bhattacharyya, *Org. Biomol. Chem.*, 2016, **14**, 570-576.
- 4 R. Kaushik, A. Singh, A. Ghosh and D. A. Jose, *ChemistrySelect*, 2016, **1**, 1533-1540.

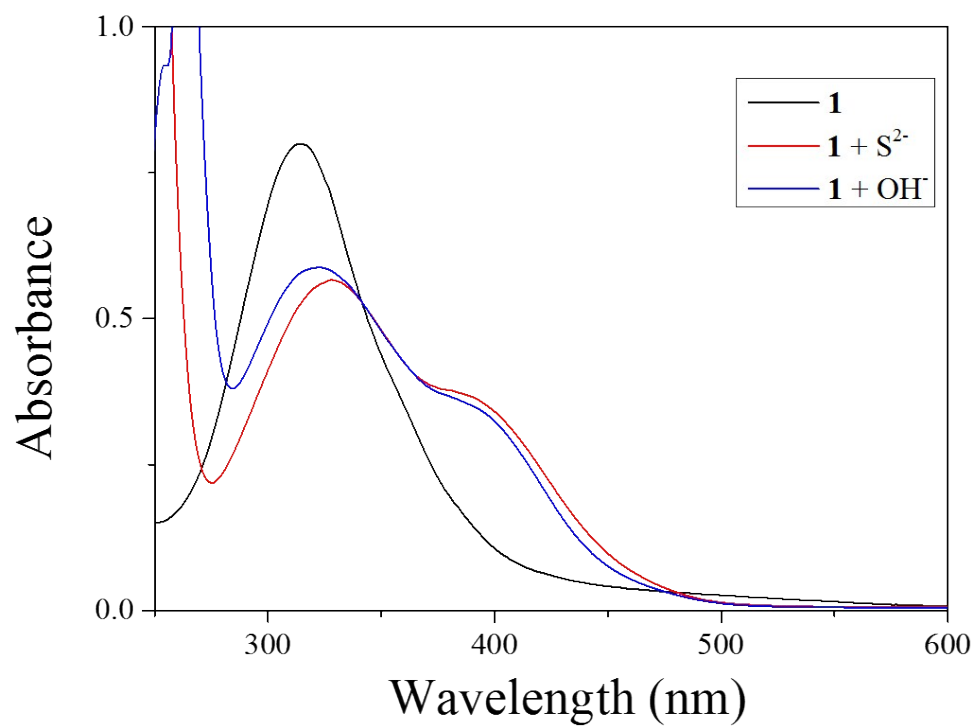

**Fig. S1.** Absorption changes of **1** (40  $\mu$ M) in the presence of NaOH (160 equiv) and  $Na_2S$  (100 equiv), respectively, in bis-tris buffer.

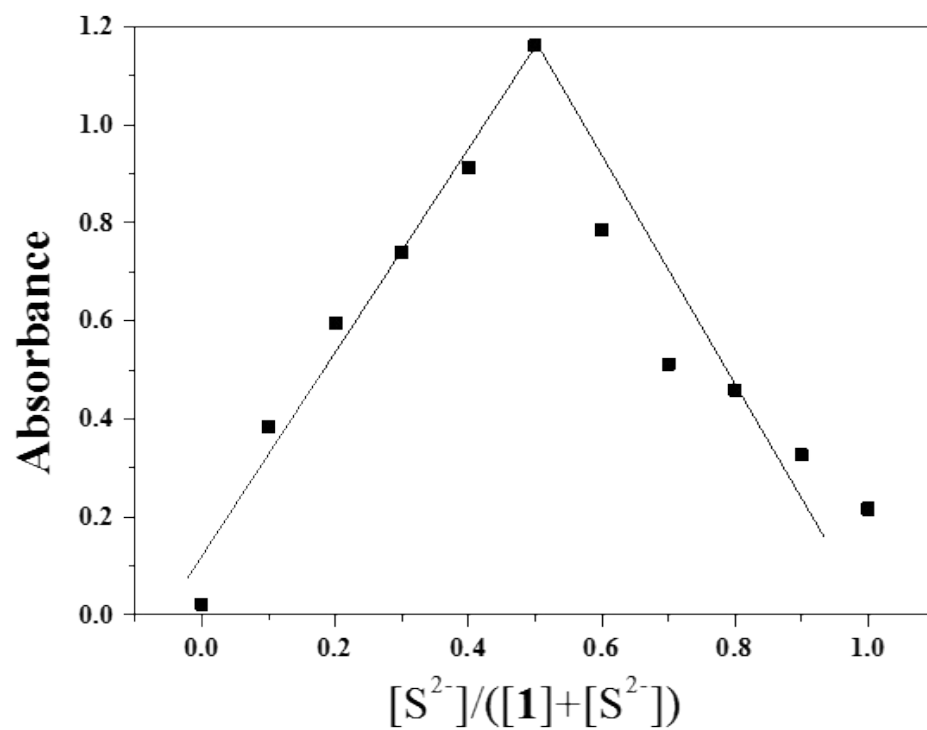

**Fig. S2** Job plot of a 1:1 complex of receptor **1** and S<sup>2-</sup> (absorbance at 400 nm). The total concentration of S<sup>2-</sup> with receptor **1** was 100  $\mu$ M.

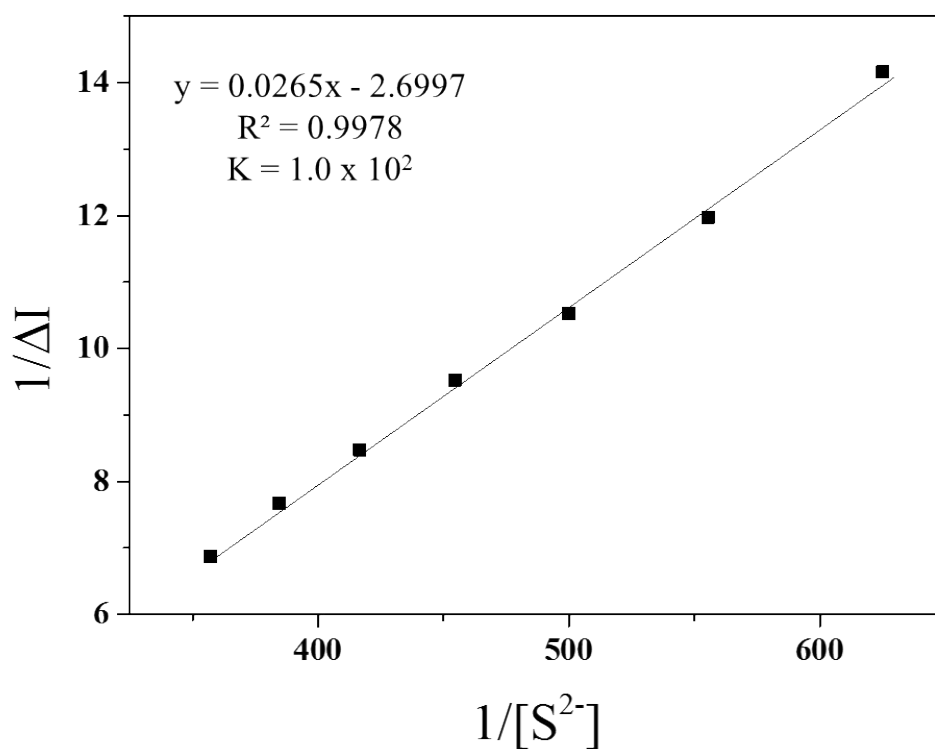

**Fig. S3** Benesi-Hildebrand plot (at 400 nm) of **1** based on UV-vis titration, assuming 1:1 stoichiometry for association between **1** and  $S^{2-}$ .

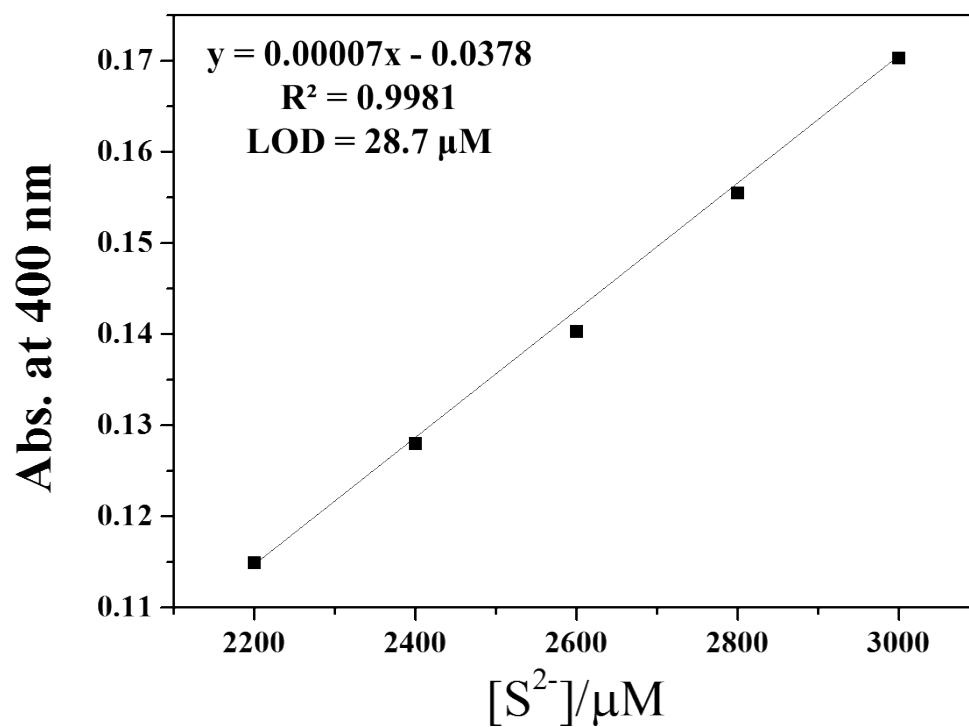

**Fig. S4** Determination of the detection limit based on UV-vis titration in the ratio (absorbance intensity at 400 nm) of **1** (40 μM) with S<sup>2-</sup>.

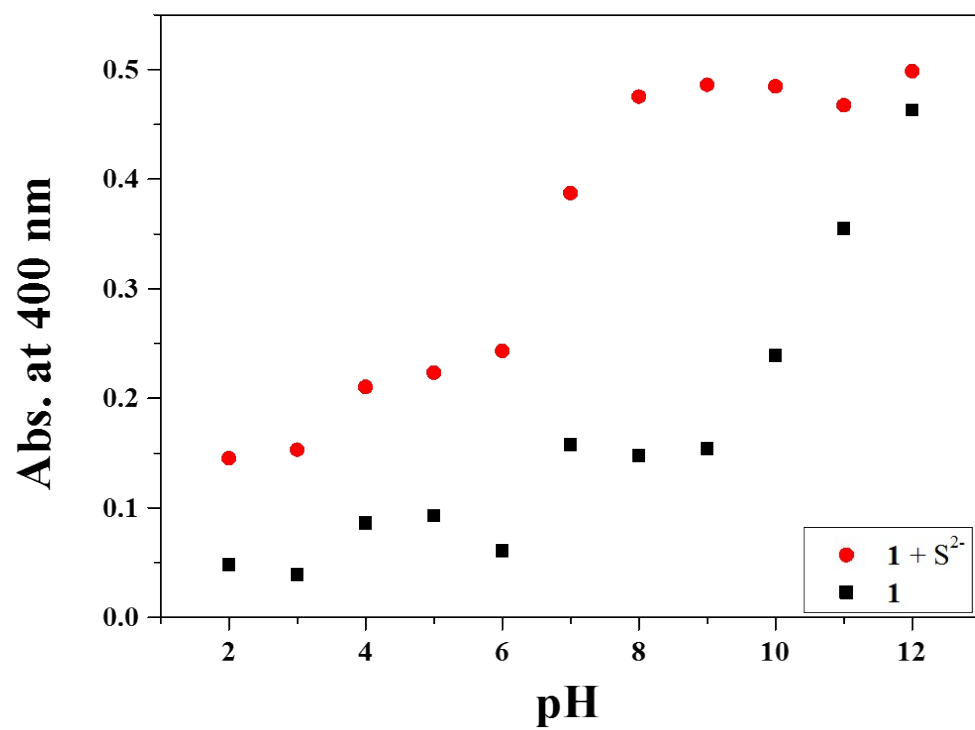

**Fig. S5** UV-vis absorbance (400 nm) of **1** and **1-S<sup>2-</sup>** at pH 2-12 in bis-tris buffer at room temperature.

(a)

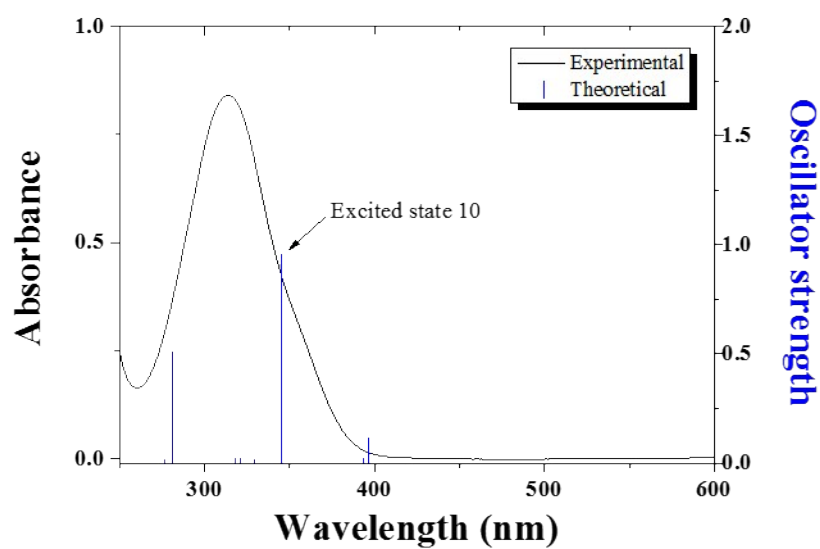

(b)

| Excited state 10 | Wavelength (nm) | Percent (%) | Main character          | Oscillator strength |
|------------------|-----------------|-------------|-------------------------|---------------------|
| H → L            | 345.6           | 98          | $\pi \rightarrow \pi^*$ | 0.9581              |

**Fig. S6** (a) The theoretical excitation energies and the experimental UV-vis spectrum of **1**. (b) The major electronic transition energy and molecular orbital contributions for **1** (H = HOMO and L = LUMO).



(a)

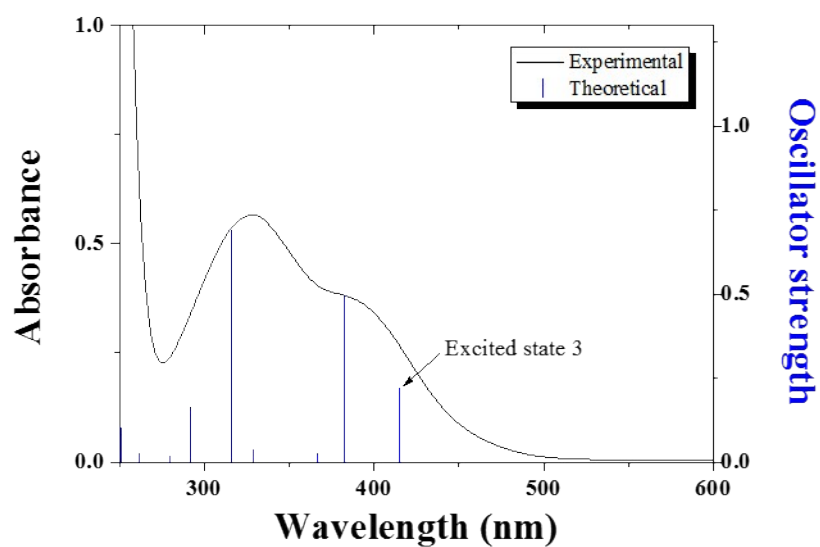

(b)

| Excited state 3 | Wavelength (nm) | Percent (%) | Main character | Oscillator strength |
|-----------------|-----------------|-------------|----------------|---------------------|
| H → L + 1       | 414.88          | 98          | ICT            | 0.2214              |

**Fig. S7** (a) The theoretical excitation energies and the experimental UV-vis spectrum of **1<sup>-</sup>**. (b) The major electronic transition energy and molecular orbital contributions for **1<sup>-</sup>** (H = HOMO and L = LUMO).
